# Supplementary material for: Type I–IV Halogen⋯Halogen Interactions: A Comparative Theoretical Study in Halobenzene⋯Halobenzene Homodimers
Source: MDPI journal article supplement (doi:10.3390/ijms23063114), 2022-03-14
Supplement: s1 [file s1]

# Type I–IV Halogen···Halogen Interactions: A Comparative Theoretical Study in Halobenzene···Halobenzene Homodimers

Mahmoud A. A. Ibrahim <sup>1,\*</sup>, Rehab R. A. Saeed <sup>1</sup>, Mohammed N. I. Shehata <sup>1</sup>, Muhammad Naeem Ahmed <sup>2</sup>, Ahmed M. Shawky <sup>3</sup>, Manal M. Khowdiary <sup>4</sup>, Eslam B. Elkaeed <sup>5</sup>, Mahmoud E. S. Soliman <sup>6,\*</sup> and Nayra A. M. Moussa <sup>1</sup>

<sup>1</sup> Computational Chemistry Laboratory, Chemistry Department, Faculty of Science, Minia University, Minia 61519, Egypt; r.saeed@compchem.net (R.R.A.S.); m.shehata@compchem.net (M.N.I.S.); n.moussa@compchem.net (N.A.M.M.)

<sup>2</sup> Department of Chemistry, The University of Azad Jammu and Kashmir, Muzaffarabad 13100, Pakistan; drnaeem@ajku.edu.pk

<sup>3</sup> Science and Technology Unit (STU), Umm Al-Qura University, Makkah 21955, Saudi Arabia; amesmail@uqu.edu.sa

<sup>4</sup> Chemistry Department, Faculty of Applied Science, Umm Al-Qura University, Al-Lith Branch, Makkah 24211, Saudi Arabia; mmkhowdairy@uqu.edu.sa

<sup>5</sup> Department of Pharmaceutical Sciences, College of Pharmacy, AlMaarefa University, Riyadh 13713, Saudi Arabia; ikaeed@mcst.edu.sa

<sup>6</sup> Molecular Modelling and Drug Design Research Group, School of Health Sciences, University of KwaZulu-Natal, Westville, Durban 4000, South Africa

\* Correspondence: m.ibrahim@compchem.net (M.A.A.I.); soliman@ukzn.ac.za (M.E.S.S.)

**Table S1.** Cartesian atomic coordinates of  $\text{C}_6\text{H}_5\text{X}\cdots\text{XC}_6\text{H}_5$  homodimers (where X = Cl, Br, and I) in the fashion of type I–IV halogen $\cdots$ halogen interactions at the most favorable parameters.

Type I

$\text{C}_6\text{H}_5\text{Cl}\cdots\text{ClC}_6\text{H}_5$

|    |             |             |             |
|----|-------------|-------------|-------------|
| C  | -0.19872095 | 0.00020035  | 4.54919767  |
| C  | -0.35467905 | 1.20292771  | 3.83462238  |
| C  | -0.29464516 | 1.21157312  | 2.42882085  |
| C  | -0.07646219 | 0.00000000  | 1.75127232  |
| C  | 0.08174204  | -1.21142685 | 2.44540334  |
| C  | 0.01896358  | -1.20258415 | 3.85113764  |
| H  | -0.24643068 | 0.00032635  | 5.64155531  |
| H  | -0.52419603 | 2.14178658  | 4.36970139  |
| H  | -0.41439149 | 2.13951087  | 1.86423171  |
| H  | 0.25029624  | -2.13951087 | 1.89366102  |
| H  | 0.14112428  | -2.14143729 | 4.39897966  |
| Cl | 0.00000000  | 0.00000000  | 0.00000000  |
| C  | 3.90859176  | -0.00022092 | -4.54920340 |
| C  | 4.07868649  | -1.20066369 | -3.83401060 |
| C  | 4.01875521  | -1.20929241 | -2.42820501 |
| C  | 3.78646208  | 0.00000008  | -1.75127220 |
| C  | 3.61401893  | 1.20912516  | -2.44602489 |
| C  | 3.67684938  | 1.20029092  | -3.85175705 |
| H  | 3.95630933  | -0.00034574 | -5.64156055 |
| H  | 4.25912453  | -2.13775682 | -4.36861324 |
| H  | 4.14940859  | -2.13546681 | -1.86313939 |
| H  | 3.43464376  | 2.13546014  | -1.89475513 |
| H  | 3.54362346  | 2.13735557  | -4.40008307 |
| Cl | 3.71000005  | 0.00000003  | 0.00000003  |

C<sub>6</sub>H<sub>5</sub>Br...BrC<sub>6</sub>H<sub>5</sub>

|    |             |             |             |
|----|-------------|-------------|-------------|
| C  | -2.17283988 | -1.76255238 | 0.61501920  |
| C  | -1.60314703 | -0.50653148 | 0.88685673  |
| C  | -2.19457340 | 0.38259536  | 1.80100679  |
| C  | -3.38150907 | 0.00000000  | 2.45346999  |
| C  | -3.96666217 | -1.25333929 | 2.19431567  |
| C  | -3.35992098 | -2.13007283 | 1.27580845  |
| H  | -1.69666851 | -2.43875933 | -0.09936072 |
| H  | -1.73512959 | 1.35445464  | 1.99781442  |
| H  | -3.84688950 | 0.68745738  | 3.16615462  |
| H  | -4.88889122 | -1.54474950 | 2.70445991  |
| H  | -3.80846977 | -3.10629535 | 1.06871259  |
| Br | 0.00000000  | 0.00000000  | 0.00000000  |
| C  | 5.90454699  | 1.74565351  | -0.58543128 |
| C  | 5.31314732  | 0.50653148  | -0.88685673 |
| C  | 5.88286568  | -0.36569569 | -1.83059537 |
| C  | 7.06994082  | 0.01679107  | -2.48286843 |
| C  | 7.67665077  | 1.25334823  | -2.19433117 |
| C  | 7.09146048  | 2.11330485  | -1.24644923 |
| H  | 5.44504906  | 2.40888023  | 0.15167432  |
| H  | 5.40673901  | -1.32456768 | -2.05014181 |
| H  | 7.51848723  | -0.65756136 | -3.21849775 |
| H  | 8.59886623  | 1.54476929  | -2.70449471 |
| H  | 7.55684734  | 3.07641888  | -1.01640320 |
| Br | 3.71000005  | 0.00000000  | 0.00000000  |

C<sub>6</sub>H<sub>5</sub>I...IC<sub>6</sub>H<sub>5</sub>

|   |             |             |             |
|---|-------------|-------------|-------------|
| C | -3.56104660 | -2.36233568 | 0.99052978  |
| C | -2.37379527 | -1.89389288 | 0.39651117  |
| C | -1.78202713 | -0.71287328 | 0.88355231  |
| C | -2.36067438 | 0.00000000  | 1.95089757  |
| C | -3.54800534 | -0.48141560 | 2.53426218  |
| C | -4.15063906 | -1.66032326 | 2.05795264  |
| H | -4.02286148 | -3.28007627 | 0.61368656  |
| H | -1.91589463 | -2.43923330 | -0.43259549 |
| H | -1.89261961 | 0.91570318  | 2.32089639  |
| H | -3.99965739 | 0.07093211  | 3.36399364  |
| H | -5.07291079 | -2.02923083 | 2.51525497  |
| I | 0.00000000  | 0.00000000  | 0.00000000  |
| C | 7.56803467  | 2.37516117  | -1.00642598 |
| C | 6.38069822  | 1.90680194  | -0.41251069 |
| C | 5.80202725  | 0.71287328  | -0.88355231 |
| C | 6.39373495  | -0.01287286 | -1.93494248 |
| C | 7.58097269  | 0.46863440  | -2.51842117 |
| C | 8.17060425  | 1.66035879  | -2.05799651 |
| H | 8.01968147  | 3.30292296  | -0.64200306 |
| H | 5.91272022  | 2.46207523  | 0.40428486  |
| H | 5.93578198  | -0.93853283 | -2.29260015 |
| H | 8.04276325  | -0.09370591 | -3.33576727 |
| H | 9.09287598  | 2.02926540  | -2.51529789 |
| I | 4.02000000  | -0.00000001 | 0.00000001  |

Type IIC<sub>6</sub>H<sub>5</sub>Cl...ClC<sub>6</sub>H<sub>5</sub>

|    |             |             |             |
|----|-------------|-------------|-------------|
| C  | 0.00006478  | 2.01627183  | 4.08280993  |
| C  | -0.01097347 | 0.61186868  | 3.98781347  |
| C  | -0.01105339 | -0.01908007 | 2.73009348  |
| C  | 0.00000001  | 0.77626282  | 1.57169247  |
| C  | 0.01111831  | 2.17947102  | 1.64438951  |
| C  | 0.01106351  | 2.79457140  | 2.90999579  |
| H  | 0.00006044  | 2.50035286  | 5.06321144  |
| H  | -0.01953226 | 0.00000000  | 4.89448071  |
| H  | -0.01956982 | -1.10850024 | 2.64488792  |
| H  | 0.01959171  | 2.77420783  | 0.72766352  |
| H  | 0.01969530  | 3.88643765  | 2.97521567  |
| Cl | -0.00000000 | 0.00000000  | 0.00000000  |
| C  | 8.04353604  | -0.00022021 | 0.00003655  |
| C  | 7.33644375  | -1.08655894 | 0.54901969  |
| C  | 5.92936167  | -1.09436738 | 0.55296636  |
| C  | 5.24294075  | -0.00000001 | 0.00000001  |
| C  | 5.92951044  | 1.09419632  | -0.55295420 |
| C  | 7.33664498  | 1.08619368  | -0.54893959 |
| H  | 9.13693413  | -0.00033218 | 0.00009670  |
| H  | 7.87840781  | -1.93459809 | 0.97751284  |
| H  | 5.37053284  | -1.93250811 | 0.97652221  |
| H  | 5.37094054  | 1.93249536  | -0.97654033 |
| H  | 7.87863764  | 1.93418455  | -0.97749037 |
| Cl | 3.49000010  | 0.00000000  | -0.00000000 |

C<sub>6</sub>H<sub>5</sub>Br...BrC<sub>6</sub>H<sub>5</sub>

|    |             |             |             |
|----|-------------|-------------|-------------|
| C  | 0.02020041  | -2.72640800 | 0.87884223  |
| C  | 0.00000000  | -1.38576150 | 1.30108964  |
| C  | -0.02020101 | -1.04880798 | 2.66566157  |
| C  | -0.02007111 | -2.08076358 | 3.62272549  |
| C  | -0.00001064 | -3.42880940 | 3.21924758  |
| C  | 0.02004422  | -3.74657011 | 1.84845281  |
| H  | 0.03571589  | -2.96644211 | -0.18721434 |
| H  | -0.03572538 | 0.00000000  | 2.97240782  |
| H  | -0.03573610 | -1.82522082 | 4.68646812  |
| H  | -0.00002373 | -4.22600222 | 3.96768403  |
| H  | 0.03571309  | -4.79211330 | 1.52644515  |
| Br | -0.00000000 | 0.00000000  | 0.00000000  |
| C  | 6.22918133  | 0.82409519  | 0.90723735  |
| C  | 5.54083351  | 0.00000000  | -0.00000000 |
| C  | 6.22921233  | -0.82407379 | -0.90721524 |
| C  | 7.63663153  | -0.81826127 | -0.90083462 |
| C  | 8.34322171  | 0.00003641  | 0.00002312  |
| C  | 7.63659100  | 0.81832987  | 0.90086865  |
| H  | 5.67447476  | 1.45721459  | 1.60422611  |
| H  | 5.67456440  | -1.45721018 | -1.60423505 |
| H  | 8.17844872  | -1.45738316 | -1.60443532 |
| H  | 9.43669037  | 0.00006939  | 0.00003908  |
| H  | 8.17841248  | 1.45744669  | 1.60446918  |
| Br | 3.63999991  | 0.00000000  | -0.00000000 |

C<sub>6</sub>H<sub>5</sub>I...IC<sub>6</sub>H<sub>5</sub>

|   |             |             |             |
|---|-------------|-------------|-------------|
| C | -0.00277313 | 2.04334044  | 3.88169885  |
| C | -0.00278729 | 1.06175518  | 2.87256384  |
| C | -0.00000000 | 1.46415758  | 1.52339005  |
| C | 0.00275310  | 2.82821941  | 1.17471433  |
| C | 0.00273053  | 3.79769373  | 2.19547343  |
| C | -0.00003389 | 3.41030169  | 3.54816794  |
| H | -0.00493747 | 1.73299885  | 4.93108606  |
| H | -0.00491310 | 0.00000000  | 3.13171291  |
| H | 0.00490175  | 3.12916446  | 0.12404102  |
| H | 0.00486772  | 4.85855484  | 1.92695785  |
| H | -0.00003327 | 4.16809464  | 4.33655405  |
| I | -0.00000000 | 0.00000000  | -0.00000000 |
| C | 8.17458016  | -0.87523597 | 0.84505129  |
| C | 6.76681906  | -0.88130164 | 0.85090077  |
| C | 6.07293040  | -0.00000001 | 0.00000000  |
| C | 6.76676899  | 0.88135791  | -0.85090744 |
| C | 8.17451817  | 0.87534589  | -0.84509790 |
| C | 8.88134629  | 0.00007223  | -0.00002243 |
| H | 8.71612126  | -1.55933893 | 1.50555682  |
| H | 6.21791655  | -1.56122136 | 1.50733232  |
| H | 6.21779019  | 1.56122959  | -1.50732446 |
| H | 8.71604782  | 1.55947268  | -1.50558865 |
| H | 9.97487408  | 0.00010329  | -0.00005314 |
| I | 3.96000010  | 0.00000000  | -0.00000000 |

Type IIIC<sub>6</sub>H<sub>5</sub>Cl...ClC<sub>6</sub>H<sub>5</sub>

|    |             |             |             |
|----|-------------|-------------|-------------|
| C  | -4.55353594 | 0.00006667  | 0.00021302  |
| C  | -3.84644341 | -0.00000322 | 1.21738780  |
| C  | -2.43936157 | -0.00000439 | 1.22613692  |
| C  | -1.75294065 | 0.00000000  | 0.00000000  |
| C  | -2.43951035 | 0.00007073  | -1.22597873 |
| C  | -3.84664488 | 0.00009661  | -1.21702540 |
| H  | -5.64693546 | 0.00006348  | 0.00034009  |
| H  | -4.38840771 | 0.00000000  | 2.16753364  |
| H  | -1.88053286 | -0.00005841 | 2.16522121  |
| H  | -1.88094079 | 0.00008032  | -2.16521811 |
| H  | -4.38863754 | 0.00016648  | -2.16715431 |
| Cl | 0.00000000  | 0.00000000  | 0.00000000  |
| C  | 8.13353642  | 0.00006665  | -0.00021307 |
| C  | 7.42644318  | 0.00007112  | -1.21738791 |
| C  | 6.01936158  | 0.00007068  | -1.22613704 |
| C  | 5.33294066  | 0.00000003  | 0.00000000  |
| C  | 6.01951035  | -0.00000443 | 1.22597873  |
| C  | 7.42664536  | 0.00002207  | 1.21702564  |
| H  | 9.22693547  | 0.00006347  | -0.00034014 |
| H  | 7.96840771  | 0.00013276  | -2.16753340 |
| H  | 5.46053275  | 0.00007392  | -2.16522121 |
| H  | 5.46094092  | -0.00005225 | 2.16521811  |
| H  | 7.96863755  | 0.00003372  | 2.16715407  |
| Cl | 3.58000001  | -0.00000004 | -0.00000004 |



C<sub>6</sub>H<sub>5</sub>Br...BrC<sub>6</sub>H<sub>5</sub>

|    |             |             |             |
|----|-------------|-------------|-------------|
| C  | -2.58918166 | 0.00000330  | -1.22564769 |
| C  | -1.90083396 | 0.00000000  | -0.00000000 |
| C  | -2.58921218 | -0.00000222 | 1.22561693  |
| C  | -3.99663162 | 0.00001019  | 1.21698582  |
| C  | -4.70322132 | 0.00001133  | -0.00004156 |
| C  | -3.99659085 | 0.00001794  | -1.21705699 |
| H  | -2.03447485 | 0.00000957  | -2.16725993 |
| H  | -2.03456450 | 0.00000000  | 2.16726351  |
| H  | -4.53844881 | 0.00000622  | 2.16752839  |
| H  | -5.79668951 | 0.00002504  | -0.00007578 |
| H  | -4.53841209 | 0.00001789  | -2.16759610 |
| Br | -0.00000000 | -0.00000000 | 0.00000000  |
| C  | 6.35918123  | 0.00000337  | -1.22564781 |
| C  | 5.67083342  | -0.00000004 | 0.00000005  |
| C  | 6.35921223  | -0.00000454 | 1.22561705  |
| C  | 7.76663239  | -0.00001682 | 1.21698594  |
| C  | 8.47322113  | -0.00001134 | -0.00004156 |
| C  | 7.76659042  | -0.00001128 | -1.21705699 |
| H  | 5.80447514  | 0.00000235  | -2.16725993 |
| H  | 5.80456430  | -0.00001172 | 2.16726375  |
| H  | 8.30844910  | -0.00001802 | 2.16752815  |
| H  | 9.56668884  | -0.00002504 | -0.00007567 |
| H  | 8.30841190  | -0.00000608 | -2.16759586 |
| Br | 3.77000005  | -0.00000000 | 0.00000001  |

C<sub>6</sub>H<sub>5</sub>I...IC<sub>6</sub>H<sub>5</sub>

|   |             |             |             |
|---|-------------|-------------|-------------|
| C | -4.21457958 | -0.00001876 | 1.21661401  |
| C | -2.80681872 | -0.00001384 | 1.22504067  |
| C | -2.11293030 | -0.00000000 | 0.00000000  |
| C | -2.80676866 | -0.00002048 | -1.22508585 |
| C | -4.21451855 | -0.00002408 | -1.21672547 |
| C | -4.92134666 | -0.00003404 | -0.00006755 |
| H | -4.75612020 | -0.00003025 | 2.16754222  |
| H | -2.25791645 | 0.00000000  | 2.17012978  |
| H | -2.25778985 | -0.00001134 | -2.17013025 |
| H | -4.75604820 | -0.00003976 | -2.16766071 |
| H | -6.01487446 | -0.00003352 | -0.00011123 |
| I | -0.00000000 | 0.00000000  | 0.00000000  |
| C | 8.36457996  | -0.00002533 | -1.21661401 |
| C | 6.95681839  | -0.00002046 | -1.22504067 |
| C | 6.26293020  | -0.00000000 | 0.00000000  |
| C | 6.95676832  | -0.00001381 | 1.22508585  |
| C | 8.36451893  | -0.00001752 | 1.21672547  |
| C | 9.07134609  | -0.00003405 | 0.00006755  |
| H | 8.90612106  | -0.00004196 | -2.16754222 |
| H | 6.40791636  | -0.00001174 | -2.17012978 |
| H | 6.40778952  | 0.00000037  | 2.17013025  |
| H | 8.90604763  | -0.00002807 | 2.16766071  |
| H | 10.16487484 | -0.00003352 | 0.00011122  |
| I | 4.14999991  | -0.00000000 | 0.00000000  |

Type IVC<sub>6</sub>H<sub>5</sub>Cl...ClC<sub>6</sub>H<sub>5</sub>

|    |             |             |             |
|----|-------------|-------------|-------------|
| C  | -0.00005985 | 0.00021482  | 4.55353594  |
| C  | 0.03903949  | 1.21676171  | 3.84644341  |
| C  | 0.03932110  | 1.22550631  | 2.43936157  |
| C  | 0.00000000  | 0.00000000  | 1.75294065  |
| C  | -0.03938233 | -1.22534597 | 2.43951011  |
| C  | -0.03912111 | -1.21639657 | 3.84664512  |
| H  | -0.00005258 | 0.00034189  | 5.64693546  |
| H  | 0.06950318  | 2.16641879  | 4.38840771  |
| H  | 0.06948742  | 2.16410589  | 1.88053286  |
| H  | -0.06950921 | -2.16410184 | 1.88094079  |
| H  | -0.06965741 | -2.16603470 | 4.38863754  |
| Cl | -0.00000000 | 0.00000000  | -0.00000000 |
| C  | 3.67994007  | -0.00021505 | -4.55353594 |
| C  | 3.71903952  | -1.21676159 | -3.84644365 |
| C  | 3.71932133  | -1.22550631 | -2.43936157 |
| C  | 3.67999991  | 0.00000000  | -1.75294065 |
| C  | 3.64061769  | 1.22534597  | -2.43951011 |
| C  | 3.64087900  | 1.21639657  | -3.84664512 |
| H  | 3.67994722  | -0.00034189 | -5.64693546 |
| H  | 3.74950298  | -2.16641879 | -4.38840771 |
| H  | 3.74948772  | -2.16410589 | -1.88053286 |
| H  | 3.61049088  | 2.16410208  | -1.88094091 |
| H  | 3.61034282  | 2.16603470  | -4.38863754 |
| Cl | 3.67999991  | -0.00000000 | -0.00000000 |

C<sub>6</sub>H<sub>5</sub>Br...BrC<sub>6</sub>H<sub>5</sub>

|    |             |             |             |
|----|-------------|-------------|-------------|
| C  | 0.02020041  | -0.00000000 | 2.86455321  |
| C  | -0.00000000 | 0.81319344  | 1.71810520  |
| C  | -0.02020101 | 2.21533489  | 1.81605089  |
| C  | -0.02007111 | 2.80964065  | 3.09186602  |
| C  | -0.00001064 | 2.01204157  | 4.25111485  |
| C  | 0.02004422  | 0.60986573  | 4.13299274  |
| H  | 0.03571589  | -1.08828735 | 2.76594615  |
| H  | -0.03572538 | 2.82906127  | 0.91193187  |
| H  | -0.03573610 | 3.90048385  | 3.17500234  |
| H  | -0.00002373 | 2.47980618  | 5.23948240  |
| H  | 0.03571309  | -0.01738455 | 5.02932215  |
| Br | -0.00000000 | 0.00000000  | 0.00000000  |
| C  | 3.99020059  | 0.00000021  | -2.86455321 |
| C  | 3.97000010  | -0.81319344 | -1.71810520 |
| C  | 3.94979913  | -2.21533489 | -1.81605089 |
| C  | 3.94992907  | -2.80964065 | -3.09186602 |
| C  | 3.96998937  | -2.01204157 | -4.25111485 |
| C  | 3.99004442  | -0.60986555 | -4.13299274 |
| H  | 4.00571615  | 1.08828735  | -2.76594615 |
| H  | 3.93427474  | -2.82906127 | -0.91193187 |
| H  | 3.93426377  | -3.90048385 | -3.17500234 |
| H  | 3.96997625  | -2.47980618 | -5.23948240 |
| H  | 4.00571329  | 0.01738455  | -5.02932215 |
| Br | 3.97000010  | 0.00000000  | 0.00000000  |

C<sub>6</sub>H<sub>5</sub>I...IC<sub>6</sub>H<sub>5</sub>

|   |             |             |             |
|---|-------------|-------------|-------------|
| C | -0.01210884 | 0.00000000  | 4.38664818  |
| C | -0.01218765 | -0.39851150 | 3.03644466  |
| C | -0.00000000 | 0.58598119  | 2.03004932  |
| C | 0.01215381  | 1.95537734  | 2.35693407  |
| C | 0.01206709  | 2.33775806  | 3.71178246  |
| C | -0.00003338 | 1.36490738  | 4.72828531  |
| H | -0.02157014 | -0.76339620 | 5.17065573  |
| H | -0.02156562 | -1.45871174 | 2.77116299  |
| H | 0.02155427  | 2.71105814  | 1.56741202  |
| H | 0.02150129  | 3.40153027  | 3.96835947  |
| H | -0.00003242 | 1.66821861  | 5.77890682  |
| I | -0.00000000 | 0.00000000  | -0.00000000 |
| C | 4.41789129  | -0.00000013 | -4.38664865 |
| C | 4.41781262  | 0.39851150  | -3.03644466 |
| C | 4.43000010  | -0.58598113 | -2.03004909 |
| C | 4.44215420  | -1.95537734 | -2.35693407 |
| C | 4.44206694  | -2.33775806 | -3.71178246 |
| C | 4.42996672  | -1.36490726 | -4.72828484 |
| H | 4.40843037  | 0.76339608  | -5.17065620 |
| H | 4.40843466  | 1.45871174  | -2.77116299 |
| H | 4.45155457  | -2.71105814 | -1.56741202 |
| H | 4.45150164  | -3.40153027 | -3.96835947 |
| H | 4.42996767  | -1.66821861 | -5.77890682 |
| I | 4.43000010  | 0.00000000  | -0.00000000 |
